# Supplementary material
Source: PubMed Central journal article supplement (PMC4679116)
Supplement: CJP-2015-vol60-Oct2015-417-426-eAppendix-1.pdf [file CJP-2015-vol60-Oct2015-417-426-eAppendix-1.pdf]

Gobbi G, Low NCP, Dugas E, et al. Short-term natural course of depressive symptoms and family-related stress in adolescents after separation from father. *Can J Psychiatry*. 2015;60(10):417–426.

**Online eAppendix 1 Number of missing values for each variable according to survey cycle**

|                                               | Survey cycle |     |     |      |     |     |      |      |     |     |     |     |     |     |     |     |     |     |     |     |
|-----------------------------------------------|--------------|-----|-----|------|-----|-----|------|------|-----|-----|-----|-----|-----|-----|-----|-----|-----|-----|-----|-----|
|                                               | 1            | 2   | 3   | 4    | 5   | 6   | 7    | 8    | 9   | 10  | 11  | 12  | 13  | 14  | 15  | 16  | 17  | 18  | 19  | 20  |
| Separation from father, <i>n</i>              | 45           | 49  | 48  | 602  | 51  | 44  | 161  | 123  | 27  | 48  | 68  | 40  | 36  | 36  | 32  | 40  | 36  | 37  | 41  | 15  |
| Separation from father, %                     | 4.0          | 4.3 | 4.3 | 55.5 | 4.9 | 4.2 | 15.6 | 12.1 | 2.8 | 5.0 | 7.2 | 4.3 | 4.1 | 4.2 | 3.7 | 4.7 | 4.4 | 4.6 | 5.1 | 1.9 |
| Age, <i>n</i> <sup>a</sup>                    | 0            | 0   | 0   | 0    | 0   | 0   | 0    | 0    | 0   | 0   | 0   | 0   | 0   | 0   | 0   | 0   | 0   | 0   | 0   | 0   |
| Age, % <sup>a</sup>                           | 0            | 0   | 0   | 0    | 0   | 0   | 0    | 0    | 0   | 0   | 0   | 0   | 0   | 0   | 0   | 0   | 0   | 0   | 0   | 0   |
| Sex, <i>n</i> <sup>a</sup>                    | 0            | 0   | 0   | 0    | 0   | 0   | 0    | 0    | 0   | 0   | 0   | 0   | 0   | 0   | 0   | 0   | 0   | 0   | 0   | 0   |
| Sex, % <sup>a</sup>                           | 0            | 0   | 0   | 0    | 0   | 0   | 0    | 0    | 0   | 0   | 0   | 0   | 0   | 0   | 0   | 0   | 0   | 0   | 0   | 0   |
| Depressive symptoms, <i>n</i>                 | 43           | 50  | 53  | 603  | 51  | 47  | 169  | 130  | 39  | 51  | 72  | 46  | 39  | 36  | 33  | 37  | 24  | 34  | 32  | 3   |
| Depressive symptoms, %                        | 3.8          | 4.4 | 4.7 | 55.6 | 4.9 | 4.5 | 16.4 | 12.8 | 4.1 | 5.4 | 7.6 | 4.9 | 4.5 | 4.2 | 3.9 | 4.4 | 2.9 | 4.2 | 4.0 | 0.4 |
| Relationship with father, <i>n</i>            | 62           | 63  | 72  | 612  | 65  | 53  | 168  | 129  | 34  | 48  | 67  | 41  | 41  | 35  | 27  | 38  | 26  | 28  | 34  | 4   |
| Relationship with father, %                   | 5.5          | 5.6 | 6.4 | 56.5 | 6.2 | 5.1 | 16.3 | 12.7 | 3.5 | 5.0 | 7.1 | 4.4 | 4.7 | 4.1 | 3.2 | 4.5 | 3.2 | 3.4 | 4.3 | 0.5 |
| Relationship with mother, <i>n</i>            | 60           | 63  | 69  | 611  | 64  | 51  | 169  | 127  | 32  | 48  | 68  | 41  | 40  | 36  | 29  | 38  | 26  | 29  | 34  | 4   |
| Relationship with mother, %                   | 5.3          | 5.6 | 6.2 | 56.4 | 6.1 | 4.9 | 16.4 | 12.5 | 3.3 | 5.0 | 7.2 | 4.4 | 4.6 | 4.2 | 3.4 | 4.5 | 3.2 | 3.6 | 4.2 | 0.5 |
| Relationship with siblings, <i>n</i>          | 62           | 62  | 71  | 614  | 64  | 52  | 169  | 128  | 34  | 49  | 69  | 43  | 41  | 37  | 27  | 39  | 24  | 32  | 33  | 4   |
| Relationship with siblings, %                 | 5.5          | 5.5 | 6.3 | 56.6 | 6.1 | 5.0 | 16.4 | 12.6 | 3.5 | 5.1 | 7.3 | 4.6 | 4.7 | 4.3 | 3.2 | 4.6 | 2.9 | 3.9 | 4.1 | 0.5 |
| Parents separating or divorcing, <i>n</i>     | 66           | 71  | 71  | 614  | 69  | 51  | 168  | 129  | 34  | 49  | 68  | 41  | 40  | 35  | 29  | 39  | 24  | 28  | 32  | 3   |
| Parents separating or divorcing, %            | 5.8          | 6.3 | 6.3 | 56.6 | 6.6 | 4.9 | 16.3 | 12.7 | 3.5 | 5.1 | 7.2 | 4.4 | 4.6 | 4.1 | 3.4 | 4.6 | 2.9 | 3.4 | 4.0 | 0.4 |
| New family (parents remarried), <i>n</i>      | 78           | 73  | 72  | 616  | 71  | 57  | 171  | 128  | 38  | 52  | 73  | 52  | 42  | 35  | 31  | 39  | 24  | 31  | 34  | 6   |
| New family (parents remarried), %             | 6.9          | 6.5 | 6.4 | 56.8 | 6.8 | 5.5 | 16.6 | 12.6 | 4.0 | 5.5 | 7.7 | 5.6 | 4.8 | 4.1 | 3.6 | 4.6 | 2.9 | 3.8 | 4.2 | 0.8 |
| Family financial problems, <i>n</i>           | 70           | 70  | 74  | 612  | 68  | 55  | 172  | 130  | 37  | 48  | 69  | 50  | 42  | 35  | 27  | 39  | 25  | 30  | 34  | 6   |
| Family financial problems, %                  | 6.2          | 6.2 | 6.6 | 56.5 | 6.5 | 5.3 | 16.7 | 12.8 | 3.8 | 5.0 | 7.3 | 5.3 | 4.8 | 4.1 | 3.2 | 4.6 | 3.0 | 3.7 | 4.2 | 0.8 |
| Frequency of alcohol use, <i>n</i>            | 53           | 55  | 60  | 608  | 58  | 51  | 172  | 136  | 41  | 55  | 82  | 45  | 44  | 41  | 35  | 43  | 38  | 33  | 36  | 11  |
| Frequency of alcohol use, %                   | 4.7          | 4.9 | 5.4 | 56.1 | 5.5 | 4.9 | 16.7 | 13.4 | 4.3 | 5.8 | 8.6 | 4.8 | 5.0 | 4.8 | 4.1 | 5.1 | 4.6 | 4.1 | 4.5 | 1.4 |
| Mean number of cigarettes per month, <i>n</i> | 56           | 64  | 68  | 605  | 60  | 60  | 172  | 133  | 42  | 64  | 82  | 50  | 49  | 49  | 44  | 53  | 38  | 44  | 43  | 23  |
| Mean number of cigarettes per month, %        | 4.9          | 5.7 | 6.1 | 55.8 | 5.7 | 5.8 | 16.7 | 13.0 | 4.4 | 6.7 | 8.6 | 5.3 | 5.6 | 5.7 | 5.1 | 6.3 | 4.6 | 5.4 | 5.3 | 3.0 |

<sup>a</sup> No missing data
